# Supplementary material for: Hypoxia-Activated PI3K/Akt Inhibits Oxidative Stress via the Regulation of Reactive Oxygen Species in Human Dental Pulp Cells
Source: Hindawi journal article supplement (doi:10.1155/2019/6595189), 2019-01-09
Supplement: f2 [file 6595189.f2.spv]

Archive with 13 entries (13 files):
- outputViewer0000000000.xml
- 00000000011_5603054646032079126_notesData.bin
- 00000000011_5603054646032079126_notes.xml
- 00000000013_2897235694912542998_tableData.bin
- 00000000013_2897235694912542998_table.xml
- 00000000014_6762168600126560534_tableData.bin
- 00000000014_6762168600126560534_table.xml
- 00000000015_8614836896836098326_tableData.bin
- 00000000015_8614836896836098326_table.xml
- 000000000161_6065236557790976278_tableData.bin
- 000000000161_6065236557790976278_table.xml
- outputViewer0000000001_heading.xml
- META-INF/MANIFEST.MF
