# Supplementary material for: Hypoxia-Activated PI3K/Akt Inhibits Oxidative Stress via the Regulation of Reactive Oxygen Species in Human Dental Pulp Cells
Source: Hindawi journal article supplement (doi:10.1155/2019/6595189), 2019-01-09
Supplement: f2 [file 6595189.f2.spv › 00000000011_5603054646032079126_notes.xml]

<?xml version="1.0" encoding="UTF-8"?>
<visualization creator="160000" date="2018-10-22" lang="zh-CN" name="Notes" style="visualizationStyle" type="0" version="2.4" xmlns="http://xml.spss.com/visualization" xmlns:xsi="http://www.w3.org/2001/XMLSchema-instance" xsi:schemaLocation="http://xml.spss.com/visualization http://xml.spss.com/visualization/vizml-2.4.xsd">
	<extension maxWidthSet="true" minWidthSet="true"/>
	<userSource id="tableData"/>
	<derivedVariable categorical="true" dependsOn="dimension0categories" id="dimension0" value="constant(dimension0)"/>
	<sourceVariable categorical="true" id="dimension0categories" label="Contents" source="tableData" sourceName="dimension0categories">
		<extension from="0" helpId="notes"/>
		<extension from="1" helpId="notes"/>
		<extension from="2" helpId="notes"/>
		<extension from="5" helpId="notes"/>
		<extension from="6" helpId="notes"/>
		<extension from="7" helpId="notes"/>
		<extension from="8" helpId="notes"/>
		<extension from="12" helpId="notes"/>
		<extension from="13" helpId="no_help"/>
		<extension from="14" helpId="notes"/>
		<stringFormat>
			<relabel from="0" to="Output Created"/>
			<relabel from="1" to="Comments"/>
			<relabel from="2" to="Data"/>
			<relabel from="3" to="Active Dataset"/>
			<relabel from="5" to="Filter"/>
			<relabel from="6" to="Weight"/>
			<relabel from="7" to="Split File"/>
			<relabel from="8" to="N of Rows in Working Data File"/>
			<relabel from="9" to="Definition of Missing"/>
			<relabel from="10" to="Cases Used"/>
			<relabel from="12" to="Syntax"/>
			<relabel from="13" to="Processor Time"/>
			<relabel from="14" to="Elapsed Time"/>
		</stringFormat>
	</sourceVariable>
	<derivedVariable categorical="true" dependsOn="dimension0categories" id="dimension0group0map" value="map(dimension0group0)">
		<extension from="2" helpId="notes"/>
		<extension from="13" helpId="notes"/>
		<stringFormat>
			<relabel from="2" to="Input"/>
			<relabel from="9" to="Missing Value Handling"/>
			<relabel from="13" to="Resources"/>
			<relabel from="0" to=""/>
			<relabel from="1" to=""/>
			<relabel from="12" to=""/>
		</stringFormat>
		<valueMapEntry from="2;3;5;6;7;8" to="2"/>
		<valueMapEntry from="9;10" to="9"/>
		<valueMapEntry from="13;14" to="13"/>
		<valueMapEntry from="0" to="0"/>
		<valueMapEntry from="1" to="1"/>
		<valueMapEntry from="12" to="12"/>
	</derivedVariable>
	<sourceVariable categorical="true" id="dimension0group0" source="tableData" sourceName="dimension0group0"/>
	<sourceVariable categorical="true" id="cell" source="tableData" sourceName="cell">
		<stringFormat>
			<relabel from="0" to="2018-10-22T23:22:40.743"/>
			<relabel from="1" to=" "/>
			<relabel from="2" to="C:\Users\Thinkpad\Desktop\PAPER\小修回稿\supplementary date 1 ROS\Apoptosis date（0）.sav"/>
			<relabel from="3" to="DataSet1"/>
			<relabel from="4" to="&lt;none&gt;"/>
			<relabel from="5" to="&lt;none&gt;"/>
			<relabel from="6" to="&lt;none&gt;"/>
			<relabel from="7" to="25"/>
			<relabel from="8" to="User-defined missing values are treated as missing."/>
			<relabel from="9" to="Statistics for each analysis are based on cases with no missing data for any variable in the analysis."/>
			<relabel from="10" to="ONEWAY earlyapoptosis lateapoptosis apoptosis BY group&#10;  /STATISTICS DESCRIPTIVES HOMOGENEITY&#10;  /MISSING ANALYSIS&#10;  /POSTHOC=LSD BONFERRONI T3 ALPHA(0.05).&#10;"/>
			<relabel from="11" to="0:00:00.094"/>
			<relabel from="12" to="0:00:00.048"/>
		</stringFormat>
	</sourceVariable>
	<derivedVariable categorical="true" id="column" value="constant(0)">
		<stringFormat>
			<relabel from="0" to=""/>
		</stringFormat>
	</derivedVariable>
	<graph cellStyle="cellStyle" id="graph" style="graphStyle">
		<location method="sizeToContent" part="height"/>
		<location method="sizeToContent" part="width"/>
		<location method="fixed" part="left" value="0px"/>
		<location method="attach" part="top" target="title"/>
		<coordinates id="coordinates"/>
		<faceting id="faceting">
			<cross>
				<nest>
					<variableReference ref="column"/>
				</nest>
				<nest>
					<variableReference ref="dimension0categories"/>
					<variableReference ref="dimension0group0map"/>
					<variableReference ref="dimension0"/>
				</nest>
			</cross>
		</faceting>
		<facetLayout>
			<tableLayout fitCells="ticks" verticalTitlesInCorner="true"/>
			<facetLevel gap="0pt" id="column_facetLevel" level="1">
				<axis style="axis1style">
					<majorTicks id="column_facetLevelmajorTicks" labelAngle="0" length="0" style="style1" tickFrameStyle="tickFrameStyle1"/>
				</axis>
			</facetLevel>
			<facetLevel gap="0pt" id="dimension0categories_facetLevel" level="2">
				<axis style="axis2style">
					<majorTicks id="dimension0categories_facetLevelmajorTicks" labelAngle="0" length="0" style="style2" tickFrameStyle="tickFrameStyle2"/>
				</axis>
			</facetLevel>
			<facetLevel gap="0pt" id="dimension0group0map_facetLevel" level="3">
				<axis style="axis3style">
					<majorTicks id="dimension0group0map_facetLevelmajorTicks" labelAngle="0" length="0" style="style3" tickFrameStyle="tickFrameStyle3"/>
				</axis>
			</facetLevel>
			<facetLevel gap="0pt" id="dimension0_facetLevel" level="4">
				<axis style="axis4style">
					<label style="axis4_LabelStyle" textFrameStyle="axis4_LabelStylelabelFrame"><text>Contents</text></label>
					<majorTicks id="dimension0_facetLevelmajorTicks" labelAngle="0" length="0" style="style4" tickFrameStyle="tickFrameStyle4"/>
				</axis>
			</facetLevel>
			<setCellProperties applyToConverse="true" id="tableProperties">
				<setMetaData key="cellPropId" target="graph" value="tableProperties"/>
				<setStyle style="labeling_style_tableProperties" target="labeling"/>
				<setStyle style="interval_style_tableProperties" target="interval"/>
				<setFormat target="labeling">
					<stringFormat/>
				</setFormat>
			</setCellProperties>
			<setCellProperties id="columnProp_0">
				<setMetaData key="cellPropId" target="graph" value="columnProp_0"/>
				<setFormat target="labeling">
					<dateTimeFormat baseFormat="dateTime" dayOfMonthPadding="true" dayPadding="true" dayType="month" hourFormat="AS_24" hourPadding="true" mdyOrder="dayMonthYear" minutePadding="true" monthFormat="short" separatorChars=".,-:" showDay="true" showHour="true" showMinute="true" showMonth="true" showSecond="true" showYear="true" yearAbbreviation="false"/>
				</setFormat>
				<union>
					<intersect>
						<where include="0" variable="dimension0categories"/>
					</intersect>
				</union>
			</setCellProperties>
			<setCellProperties id="columnProp_8">
				<setMetaData key="cellPropId" target="graph" value="columnProp_8"/>
				<setFormat target="labeling">
					<numberFormat maximumFractionDigits="0" minimumFractionDigits="0" minimumIntegerDigits="0" scientific="onlyForSmall" small="0" useGrouping="false"/>
				</setFormat>
				<union>
					<intersect>
						<where include="8" variable="dimension0categories"/>
					</intersect>
				</union>
			</setCellProperties>
			<setCellProperties id="columnProp_13">
				<setMetaData key="cellPropId" target="graph" value="columnProp_13"/>
				<setFormat target="labeling">
					<dateTimeFormat baseFormat="time" hourFormat="AS_24" hourPadding="true" minutePadding="true" secondPadding="true" showHour="true" showMillis="true" showMinute="true" showSecond="true"/>
				</setFormat>
				<union>
					<intersect>
						<where include="13" variable="dimension0categories"/>
					</intersect>
				</union>
			</setCellProperties>
			<setCellProperties id="columnProp_14">
				<setMetaData key="cellPropId" target="graph" value="columnProp_14"/>
				<setFormat target="labeling">
					<dateTimeFormat baseFormat="time" hourFormat="AS_24" hourPadding="true" minutePadding="true" secondPadding="true" showHour="true" showMillis="true" showMinute="true" showSecond="true"/>
				</setFormat>
				<union>
					<intersect>
						<where include="14" variable="dimension0categories"/>
					</intersect>
				</union>
			</setCellProperties>
		</facetLayout>
		<interval id="interval" style="intervalstyle">
			<labeling id="labeling" variable="cell"/>
		</interval>
	</graph>
	<labelFrame id="title" style="titlestyle">
		<location method="fixed" part="top" value="0%"/>
		<location method="sizeToContent" part="height"/>
		<label purpose="title" style="titleLabelStyle"><text>Notes</text></label>
	</labelFrame>
	<style id="visualizationStyle"/>
	<style id="graphStyle"/>
	<style border-bottom="none" border-left="none" border-right="none" border-top="none" id="cellStyle" width="162pt;162pt;162pt"/>
	<style id="titlestyle"/>
	<style id="titleLabelStyle"/>
	<style color="transparent" id="axis1style"/>
	<style id="style1" visible="false"/>
	<style color2="transparent" id="tickFrameStyle1"/>
	<style color="transparent" id="axis2style"/>
	<style id="style2"/>
	<style color2="transparent" id="tickFrameStyle2"/>
	<style color="transparent" id="axis3style"/>
	<style id="style3"/>
	<style color2="transparent" id="tickFrameStyle3"/>
	<style color="transparent" id="axis4style"/>
	<style id="style4" visible="false"/>
	<style color2="transparent" id="tickFrameStyle4"/>
	<style id="axis4_LabelStyle" labelAngle="0"/>
	<style color2="transparent" id="axis4_LabelStylelabelFrame"/>
	<style color2="transparent" id="intervalstyle"/>
	<style id="labeling_style_tableProperties"/>
	<style id="interval_style_tableProperties"/>
</visualization>
