# Supplementary material for: Hypoxia-Activated PI3K/Akt Inhibits Oxidative Stress via the Regulation of Reactive Oxygen Species in Human Dental Pulp Cells
Source: Hindawi journal article supplement (doi:10.1155/2019/6595189), 2019-01-09
Supplement: f2 [file 6595189.f2.spv › 00000000013_2897235694912542998_table.xml]

<?xml version="1.0" encoding="UTF-8"?>
<visualization creator="160000" date="2018-10-22" id="visualization_2413" lang="zh-CN" name="Descriptives" style="visualizationStyle" type="0.015" version="2.4" xmlns="http://xml.spss.com/visualization" xmlns:xsi="http://www.w3.org/2001/XMLSchema-instance" xsi:schemaLocation="http://xml.spss.com/visualization http://xml.spss.com/visualization/vizml-2.4.xsd">
<!--  Data  -->
<userSource id="tableData" missing="listwise"/>
<derivedVariable categorical="true" dependsOn="dimension0categories" id="dimension0" value="constant(dimension0)"/>
<sourceVariable categorical="true" id="dimension0categories" label="Dependent Variable" source="tableData" sourceName="dimension0categories"><stringFormat><relabel from="0" to="earlyapoptosis"/><relabel from="1" to="lateapoptosis"/><relabel from="2" to="apoptosis"/></stringFormat></sourceVariable>
<derivedVariable categorical="true" dependsOn="dimension1categories" id="dimension1" value="constant(dimension1)"/>
<sourceVariable categorical="true" id="dimension1categories" label="Groups" source="tableData" sourceName="dimension1categories"><extension from="4" helpId="total_4" id="extension_2420"/><stringFormat><relabel from="0" to="1"/><relabel from="1" to="2"/><relabel from="2" to="3"/><relabel from="3" to="4"/><relabel from="4" to="Total"/></stringFormat></sourceVariable>
<derivedVariable categorical="true" dependsOn="dimension2categories" id="dimension2" value="constant(dimension2)"/>
<sourceVariable categorical="true" id="dimension2categories" label="Statistics" source="tableData" sourceName="dimension2categories"><extension from="0" helpId="n" id="extension_2424"/><extension from="1" helpId="mean" id="extension_2425"/><extension from="2" helpId="gbar11" id="extension_2426"/><extension from="3" helpId="standard_error" id="extension_2427"/><extension from="4" helpId="lower_bound" id="extension_2428"/><extension from="5" helpId="upper_bound" id="extension_2429"/><extension from="6" helpId="minimum" id="extension_2430"/><extension from="7" helpId="maximum" id="extension_2431"/><stringFormat><relabel from="0" to="N"/><relabel from="1" to="Mean"/><relabel from="2" to="Std. Deviation"/><relabel from="3" to="Std. Error"/><relabel from="4" to="Lower Bound"/><relabel from="5" to="Upper Bound"/><relabel from="6" to="Minimum"/><relabel from="7" to="Maximum"/></stringFormat></sourceVariable>
<derivedVariable categorical="true" dependsOn="dimension2categories" id="dimension2group0map" value="map(dimension2group0)"><extension from="4" helpId="gerrorbar01" id="extension_2434"/><stringFormat><relabel from="4" to="95% Confidence Interval for Mean"/><relabel from="0" to=""/><relabel from="1" to=""/><relabel from="2" to=""/><relabel from="3" to=""/><relabel from="6" to=""/><relabel from="7" to=""/></stringFormat><valueMapEntry from="4;5" id="valueMapEntry_2436" to="4"/><valueMapEntry from="0" id="valueMapEntry_2437" to="0"/><valueMapEntry from="1" id="valueMapEntry_2438" to="1"/><valueMapEntry from="2" id="valueMapEntry_2439" to="2"/><valueMapEntry from="3" id="valueMapEntry_2440" to="3"/><valueMapEntry from="6" id="valueMapEntry_2441" to="6"/><valueMapEntry from="7" id="valueMapEntry_2442" to="7"/></derivedVariable>
<sourceVariable categorical="true" id="dimension2group0" source="tableData" sourceName="dimension2group0"/>
<sourceVariable categorical="true" id="cell" source="tableData" sourceName="cell"><stringFormat><relabel from="-1.797693134862316E300" to="."/></stringFormat></sourceVariable>
<!--  Structure  -->
<graph cellStyle="cellStyle" id="graph" style="graphStyle"><!--  Size  -->
<location id="location_2447" method="sizeToContent" part="height"/>
<location id="location_2448" method="sizeToContent" part="width"/>
<location id="location_2449" method="fixed" part="left" value="0px"/>
<location id="location_2450" method="attach" part="top" target="title"/>
<coordinates id="coordinates"/><faceting id="faceting"><cross id="cross_2453"><nest id="nest_2454"><variableReference ref="dimension2categories"/><variableReference ref="dimension2group0map"/><variableReference ref="dimension2"/></nest><nest id="nest_2458"><variableReference ref="dimension1categories"/><variableReference ref="dimension1"/><variableReference ref="dimension0categories"/><variableReference ref="dimension0"/></nest></cross></faceting><facetLayout id="facetLayout_2463"><tableLayout fitCells="ticks" id="tableLayout_2464" style="style_2591" verticalTitlesInCorner="true"/><facetLevel gap="0pt" id="dimension2categories_facetLevel" level="1"><axis id="axis_2466" style="axis1style"><majorTicks id="dimension2categories_facetLevelmajorTicks" labelAngle="0" length="0" style="style1" tickFrameStyle="tickFrameStyle1"><gridline id="gridline_2597" style="style_2598" zOrder="29"/></majorTicks></axis></facetLevel><facetLevel gap="0pt" id="dimension2group0map_facetLevel" level="2"><axis id="axis_2469" style="axis2style"><majorTicks id="dimension2group0map_facetLevelmajorTicks" labelAngle="0" length="0" style="style2" tickFrameStyle="tickFrameStyle2"><gridline id="gridline_2599" style="style_2600" zOrder="29"/></majorTicks></axis></facetLevel><facetLevel gap="0pt" id="dimension2_facetLevel" level="3"><axis id="axis_2472" style="axis3style"><label id="label_2473" style="axis3_LabelStyle" textFrameStyle="axis3_LabelStylelabelFrame"><text id="text_2474">Statistics</text></label><majorTicks id="dimension2_facetLevelmajorTicks" labelAngle="0" length="0" style="style3" tickFrameStyle="tickFrameStyle3"/></axis></facetLevel><facetLevel gap="0pt" id="dimension1categories_facetLevel" level="4"><axis id="axis_2477" style="axis4style"><majorTicks id="dimension1categories_facetLevelmajorTicks" labelAngle="0" length="0" style="style4" tickFrameStyle="tickFrameStyle4"><gridline id="gridline_2593" style="style_2594" zOrder="28"/></majorTicks></axis></facetLevel><facetLevel gap="0pt" id="dimension1_facetLevel" level="5"><axis id="axis_2480" style="axis5style"><label id="label_2481" style="axis5_LabelStyle" textFrameStyle="axis5_LabelStylelabelFrame"><text id="text_2482">Groups</text></label><majorTicks id="dimension1_facetLevelmajorTicks" labelAngle="0" length="0" style="style5" tickFrameStyle="tickFrameStyle5"/></axis></facetLevel><facetLevel gap="0pt" id="dimension0categories_facetLevel" level="6"><axis id="axis_2485" style="axis6style"><majorTicks id="dimension0categories_facetLevelmajorTicks" labelAngle="0" length="0" style="style6" tickFrameStyle="tickFrameStyle6"><gridline id="gridline_2601" style="style_2602" zOrder="30"/></majorTicks></axis></facetLevel><facetLevel gap="0pt" id="dimension0_facetLevel" level="7"><axis id="axis_2488" style="axis7style"><label id="label_2489" style="axis7_LabelStyle" textFrameStyle="axis7_LabelStylelabelFrame"><text id="text_2490">Dependent Variable</text></label><majorTicks id="dimension0_facetLevelmajorTicks" labelAngle="0" length="0" style="style7" tickFrameStyle="tickFrameStyle7"/></axis></facetLevel><setCellProperties applyToConverse="true" id="tableProperties"><setMetaData id="setMetaData_2493" key="cellPropId" target="graph" value="tableProperties"/><setStyle id="setStyle_2494" style="labeling_style_tableProperties" target="labeling"/><setStyle id="setStyle_2495" style="interval_style_tableProperties" target="interval"/><setFormat id="setFormat_2496" target="labeling"><numberFormat maximumFractionDigits="4" minimumFractionDigits="4" minimumIntegerDigits="0" scientific="onlyForSmall" small="0" useGrouping="false"/></setFormat></setCellProperties><setCellProperties id="columnProp_0"><setMetaData id="setMetaData_2499" key="cellPropId" target="graph" value="columnProp_0"/><setFormat id="setFormat_2500" target="labeling"><numberFormat maximumFractionDigits="0" minimumFractionDigits="0" minimumIntegerDigits="0" scientific="onlyForSmall" small="0" useGrouping="false"/></setFormat><union id="union_2502"><intersect id="intersect_2503"><where id="where_2504" include="0" variable="dimension2categories"/></intersect></union></setCellProperties><setCellProperties id="columnProp_2"><setMetaData id="setMetaData_2506" key="cellPropId" target="graph" value="columnProp_2"/><setFormat id="setFormat_2507" target="labeling"><numberFormat maximumFractionDigits="5" minimumFractionDigits="5" minimumIntegerDigits="0" scientific="onlyForSmall" small="0" useGrouping="false"/></setFormat><union id="union_2509"><intersect id="intersect_2510"><where id="where_2511" include="2" variable="dimension2categories"/></intersect></union></setCellProperties><setCellProperties id="columnProp_3"><setMetaData id="setMetaData_2513" key="cellPropId" target="graph" value="columnProp_3"/><setFormat id="setFormat_2514" target="labeling"><numberFormat maximumFractionDigits="5" minimumFractionDigits="5" minimumIntegerDigits="0" scientific="onlyForSmall" small="0" useGrouping="false"/></setFormat><union id="union_2516"><intersect id="intersect_2517"><where id="where_2518" include="3" variable="dimension2categories"/></intersect></union></setCellProperties><setCellProperties id="columnProp_6"><setMetaData id="setMetaData_2520" key="cellPropId" target="graph" value="columnProp_6"/><setFormat id="setFormat_2521" target="labeling"><numberFormat maximumFractionDigits="2" minimumFractionDigits="2" minimumIntegerDigits="0" scientific="onlyForSmall" small="0" useGrouping="false"/></setFormat><union id="union_2523"><intersect id="intersect_2524"><where id="where_2525" include="6" variable="dimension2categories"/></intersect></union></setCellProperties><setCellProperties id="columnProp_7"><setMetaData id="setMetaData_2527" key="cellPropId" target="graph" value="columnProp_7"/><setFormat id="setFormat_2528" target="labeling"><numberFormat maximumFractionDigits="2" minimumFractionDigits="2" minimumIntegerDigits="0" scientific="onlyForSmall" small="0" useGrouping="false"/></setFormat><union id="union_2530"><intersect id="intersect_2531"><where id="where_2532" include="7" variable="dimension2categories"/></intersect></union></setCellProperties></facetLayout><interval id="interval" style="intervalstyle"><labeling id="labeling" style="style_2592" variable="cell"/></interval></graph>
<labelFrame id="title" style="titlestyle"><!--  Size  -->
<location id="location_2536" method="fixed" part="top" value="0%"/>
<location id="location_2537" method="sizeToContent" part="height"/>
<label id="label_2538" purpose="title" style="titleLabelStyle"><text id="text_2539">Descriptives</text></label></labelFrame>
<!--  Styles  -->
<style border-bottom="none" border-bottom-color="black" border-left="none" border-left-color="black" border-right="none" border-right-color="black" border-top="none" border-top-color="black" id="visualizationStyle"/>
<style border-bottom="thick" border-bottom-color="black" border-left="thick" border-left-color="black" border-right="thick" border-right-color="black" border-top="thick" border-top-color="black" id="graphStyle"/>
<style border-bottom="none" border-left="none" border-right="none" border-top="none" id="cellStyle" width="100%,50pt,72pt"/>
<style id="titlestyle"/>
<style color="black" font-family="SansSerif" font-size="9pt" font-weight="bold" id="titleLabelStyle" labelLocationVertical="center" margin-bottom="6pt" margin-left="6pt" margin-right="8pt" margin-top="1pt" textAlignment="center"/>
<style color="transparent" id="axis1style"/>
<style color="black" font-family="SansSerif" font-size="9pt" font-weight="regular" id="style1" labelLocationVertical="negative" margin-bottom="2pt" margin-left="6pt" margin-right="8pt" margin-top="1pt" textAlignment="center"/>
<style border-top="solid" border-top-color="black" color2="transparent" id="tickFrameStyle1"/>
<style color="transparent" id="axis2style"/>
<style color="black" font-family="SansSerif" font-size="9pt" font-weight="regular" id="style2" labelLocationVertical="negative" margin-bottom="2pt" margin-left="6pt" margin-right="8pt" margin-top="1pt" textAlignment="center"/>
<style border-bottom="solid" border-bottom-color="black" border-top="solid" border-top-color="black" color2="transparent" id="tickFrameStyle2"/>
<style color="transparent" id="axis3style"/>
<style color="black" font-family="SansSerif" font-size="9pt" font-weight="regular" id="style3" labelLocationVertical="negative" margin-bottom="2pt" margin-left="6pt" margin-right="8pt" margin-top="1pt" textAlignment="center" visible="false"/>
<style color2="transparent" id="tickFrameStyle3"/>
<style color="black" font-family="SansSerif" font-size="9pt" font-weight="regular" id="axis3_LabelStyle" labelAngle="0" labelLocationVertical="negative" margin-bottom="2pt" margin-left="6pt" margin-right="8pt" margin-top="1pt" textAlignment="center" visible="false"/>
<style color2="transparent" id="axis3_LabelStylelabelFrame"/>
<style color="transparent" id="axis4style"/>
<style color="black" font-family="SansSerif" font-size="9pt" font-weight="regular" id="style4" labelLocationVertical="positive" margin-bottom="1pt" margin-left="6pt" margin-right="8pt" margin-top="1pt" size="100%,36pt,120pt" textAlignment="left"/>
<style border-left="none" border-left-color="black" color2="transparent" id="tickFrameStyle4"/>
<style color="transparent" id="axis5style"/>
<style color="black" font-family="SansSerif" font-size="9pt" font-weight="regular" id="style5" labelLocationVertical="positive" margin-bottom="1pt" margin-left="6pt" margin-right="8pt" margin-top="1pt" textAlignment="left" visible="false"/>
<style color2="transparent" id="tickFrameStyle5"/>
<style id="axis5_LabelStyle" labelAngle="0" visible="false"/>
<style color2="transparent" id="axis5_LabelStylelabelFrame"/>
<style color="transparent" id="axis6style"/>
<style color="black" font-family="SansSerif" font-size="9pt" font-weight="regular" id="style6" labelLocationVertical="positive" margin-bottom="1pt" margin-left="6pt" margin-right="8pt" margin-top="1pt" size="100%,36pt,120pt" textAlignment="left"/>
<style border-right="none" border-right-color="black" color2="transparent" id="tickFrameStyle6"/>
<style color="transparent" id="axis7style"/>
<style color="black" font-family="SansSerif" font-size="9pt" font-weight="regular" id="style7" labelLocationVertical="positive" margin-bottom="1pt" margin-left="6pt" margin-right="8pt" margin-top="1pt" textAlignment="left" visible="false"/>
<style color2="transparent" id="tickFrameStyle7"/>
<style id="axis7_LabelStyle" labelAngle="0" visible="false"/>
<style color2="transparent" id="axis7_LabelStylelabelFrame"/>
<style color2="transparent" id="intervalstyle"/>
<style id="labeling_style_tableProperties"/>
<style id="interval_style_tableProperties"/>
<style border-bottom="thick" border-bottom-color="black" border-left="none" border-right="thick" border-right-color="black" border-top="none" id="style_2591"/>
<style color="black" font-family="SansSerif" font-size="9pt" font-weight="regular" id="style_2592" labelLocationVertical="center" margin-bottom="1pt" margin-left="6pt" margin-right="8pt" margin-top="1pt" textAlignment="mixed"/>
<style border-bottom="none" border-bottom-color="black" border-left="none" border-right="none" border-top="none" id="style_2594"/>
<style border-bottom="none" border-bottom-color="black" border-left="none" border-right="none" border-top="none" id="style_2596"/>
<style border-bottom="none" border-left="none" border-right="solid" border-right-color="black" border-top="none" id="style_2598"/>
<style border-bottom="none" border-left="none" border-right="solid" border-right-color="black" border-top="none" id="style_2600"/>
<style border-bottom="solid" border-bottom-color="black" border-left="none" border-right="none" border-top="none" id="style_2602"/>
</visualization>
