# Supplementary material for: Hypoxia-Activated PI3K/Akt Inhibits Oxidative Stress via the Regulation of Reactive Oxygen Species in Human Dental Pulp Cells
Source: Hindawi journal article supplement (doi:10.1155/2019/6595189), 2019-01-09
Supplement: f2 [file 6595189.f2.spv › 00000000015_8614836896836098326_table.xml]

<?xml version="1.0" encoding="UTF-8"?>
<visualization creator="160000" date="2018-10-22" id="visualization_2272" lang="zh-CN" name="ANOVA" style="visualizationStyle" type="0.016" version="2.4" xmlns="http://xml.spss.com/visualization" xmlns:xsi="http://www.w3.org/2001/XMLSchema-instance" xsi:schemaLocation="http://xml.spss.com/visualization http://xml.spss.com/visualization/vizml-2.4.xsd">
<!--  Data  -->
<userSource id="tableData" missing="listwise"/>
<derivedVariable categorical="true" dependsOn="dimension0categories" id="dimension0" value="constant(dimension0)"/>
<sourceVariable categorical="true" id="dimension0categories" label="Dependent Variable" source="tableData" sourceName="dimension0categories"><stringFormat><relabel from="0" to="earlyapoptosis"/><relabel from="1" to="lateapoptosis"/><relabel from="2" to="apoptosis"/></stringFormat></sourceVariable>
<derivedVariable categorical="true" dependsOn="dimension1categories" id="dimension1" value="constant(dimension1)"/>
<sourceVariable categorical="true" id="dimension1categories" label="Source" source="tableData" sourceName="dimension1categories"><extension from="0" helpId="between-groups_variability" id="extension_2279"/><extension from="1" helpId="within-groups_variability" id="extension_2280"/><extension from="2" helpId="total_4" id="extension_2281"/><stringFormat><relabel from="0" to="Between Groups"/><relabel from="1" to="Within Groups"/><relabel from="2" to="Total"/></stringFormat></sourceVariable>
<derivedVariable categorical="true" dependsOn="dimension2categories" id="dimension2" value="constant(dimension2)"/>
<sourceVariable categorical="true" id="dimension2categories" label="Statistics" source="tableData" sourceName="dimension2categories"><extension from="0" helpId="sum_of_squares" id="extension_2285"/><extension from="1" helpId="df" id="extension_2286"/><extension from="2" helpId="mean_square" id="extension_2287"/><extension from="3" helpId="f_value" id="extension_2288"/><extension from="4" helpId="significance_level" id="extension_2289"/><stringFormat><relabel from="0" to="Sum of Squares"/><relabel from="1" to="df"/><relabel from="2" to="Mean Square"/><relabel from="3" to="F"/><relabel from="4" to="Sig."/></stringFormat></sourceVariable>
<sourceVariable categorical="true" id="cell" source="tableData" sourceName="cell"><stringFormat><relabel from="-1.797693134862316E300" to="."/></stringFormat></sourceVariable>
<!--  Structure  -->
<graph cellStyle="cellStyle" id="graph" style="graphStyle"><!--  Size  -->
<location id="location_2294" method="sizeToContent" part="height"/>
<location id="location_2295" method="sizeToContent" part="width"/>
<location id="location_2296" method="fixed" part="left" value="0px"/>
<location id="location_2297" method="attach" part="top" target="title"/>
<coordinates id="coordinates"/><faceting id="faceting"><cross id="cross_2300"><nest id="nest_2301"><variableReference ref="dimension2categories"/><variableReference ref="dimension2"/></nest><nest id="nest_2304"><variableReference ref="dimension1categories"/><variableReference ref="dimension1"/><variableReference ref="dimension0categories"/><variableReference ref="dimension0"/></nest></cross></faceting><facetLayout id="facetLayout_2309"><tableLayout fitCells="ticks" id="tableLayout_2310" style="style_2403" verticalTitlesInCorner="true"/><facetLevel gap="0pt" id="dimension2categories_facetLevel" level="1"><axis id="axis_2312" style="axis1style"><majorTicks id="dimension2categories_facetLevelmajorTicks" labelAngle="0" length="0" style="style1" tickFrameStyle="tickFrameStyle1"><gridline id="gridline_2409" style="style_2410" zOrder="29"/></majorTicks></axis></facetLevel><facetLevel gap="0pt" id="dimension2_facetLevel" level="2"><axis id="axis_2315" style="axis2style"><label id="label_2316" style="axis2_LabelStyle" textFrameStyle="axis2_LabelStylelabelFrame"><text id="text_2317">Statistics</text></label><majorTicks id="dimension2_facetLevelmajorTicks" labelAngle="0" length="0" style="style2" tickFrameStyle="tickFrameStyle2"/></axis></facetLevel><facetLevel gap="0pt" id="dimension1categories_facetLevel" level="3"><axis id="axis_2320" style="axis3style"><majorTicks id="dimension1categories_facetLevelmajorTicks" labelAngle="0" length="0" style="style3" tickFrameStyle="tickFrameStyle3"><gridline id="gridline_2405" style="style_2406" zOrder="28"/></majorTicks></axis></facetLevel><facetLevel gap="0pt" id="dimension1_facetLevel" level="4"><axis id="axis_2323" style="axis4style"><label id="label_2324" style="axis4_LabelStyle" textFrameStyle="axis4_LabelStylelabelFrame"><text id="text_2325">Source</text></label><majorTicks id="dimension1_facetLevelmajorTicks" labelAngle="0" length="0" style="style4" tickFrameStyle="tickFrameStyle4"/></axis></facetLevel><facetLevel gap="0pt" id="dimension0categories_facetLevel" level="5"><axis id="axis_2328" style="axis5style"><majorTicks id="dimension0categories_facetLevelmajorTicks" labelAngle="0" length="0" style="style5" tickFrameStyle="tickFrameStyle5"><gridline id="gridline_2411" style="style_2412" zOrder="30"/></majorTicks></axis></facetLevel><facetLevel gap="0pt" id="dimension0_facetLevel" level="6"><axis id="axis_2331" style="axis6style"><label id="label_2332" style="axis6_LabelStyle" textFrameStyle="axis6_LabelStylelabelFrame"><text id="text_2333">Dependent Variable</text></label><majorTicks id="dimension0_facetLevelmajorTicks" labelAngle="0" length="0" style="style6" tickFrameStyle="tickFrameStyle6"/></axis></facetLevel><setCellProperties applyToConverse="true" id="tableProperties"><setMetaData id="setMetaData_2336" key="cellPropId" target="graph" value="tableProperties"/><setStyle id="setStyle_2337" style="labeling_style_tableProperties" target="labeling"/><setStyle id="setStyle_2338" style="interval_style_tableProperties" target="interval"/><setFormat id="setFormat_2339" target="labeling"><numberFormat maximumFractionDigits="3" minimumFractionDigits="3" minimumIntegerDigits="0" scientific="onlyForSmall" small="0" useGrouping="false"/></setFormat></setCellProperties><setCellProperties id="columnProp_1"><setMetaData id="setMetaData_2342" key="cellPropId" target="graph" value="columnProp_1"/><setFormat id="setFormat_2343" target="labeling"><numberFormat maximumFractionDigits="0" minimumFractionDigits="0" minimumIntegerDigits="0" scientific="onlyForSmall" small="0" useGrouping="false"/></setFormat><union id="union_2345"><intersect id="intersect_2346"><where id="where_2347" include="1" variable="dimension2categories"/></intersect></union></setCellProperties></facetLayout><interval id="interval" style="intervalstyle"><labeling id="labeling" style="style_2404" variable="cell"/></interval></graph>
<labelFrame id="title" style="titlestyle"><!--  Size  -->
<location id="location_2351" method="fixed" part="top" value="0%"/>
<location id="location_2352" method="sizeToContent" part="height"/>
<label id="label_2353" purpose="title" style="titleLabelStyle"><text id="text_2354">ANOVA</text></label></labelFrame>
<!--  Styles  -->
<style border-bottom="none" border-bottom-color="black" border-left="none" border-left-color="black" border-right="none" border-right-color="black" border-top="none" border-top-color="black" id="visualizationStyle"/>
<style border-bottom="thick" border-bottom-color="black" border-left="thick" border-left-color="black" border-right="thick" border-right-color="black" border-top="thick" border-top-color="black" id="graphStyle"/>
<style border-bottom="none" border-left="none" border-right="none" border-top="none" id="cellStyle" width="100%,50pt,72pt"/>
<style id="titlestyle"/>
<style color="black" font-family="SansSerif" font-size="9pt" font-weight="bold" id="titleLabelStyle" labelLocationVertical="center" margin-bottom="6pt" margin-left="6pt" margin-right="8pt" margin-top="1pt" textAlignment="center"/>
<style color="transparent" id="axis1style"/>
<style color="black" font-family="SansSerif" font-size="9pt" font-weight="regular" id="style1" labelLocationVertical="negative" margin-bottom="2pt" margin-left="6pt" margin-right="8pt" margin-top="1pt" textAlignment="center"/>
<style border-top="solid" border-top-color="black" color2="transparent" id="tickFrameStyle1"/>
<style color="transparent" id="axis2style"/>
<style color="black" font-family="SansSerif" font-size="9pt" font-weight="regular" id="style2" labelLocationVertical="negative" margin-bottom="2pt" margin-left="6pt" margin-right="8pt" margin-top="1pt" textAlignment="center" visible="false"/>
<style color2="transparent" id="tickFrameStyle2"/>
<style color="black" font-family="SansSerif" font-size="9pt" font-weight="regular" id="axis2_LabelStyle" labelAngle="0" labelLocationVertical="negative" margin-bottom="2pt" margin-left="6pt" margin-right="8pt" margin-top="1pt" textAlignment="center" visible="false"/>
<style color2="transparent" id="axis2_LabelStylelabelFrame"/>
<style color="transparent" id="axis3style"/>
<style color="black" font-family="SansSerif" font-size="9pt" font-weight="regular" id="style3" labelLocationVertical="positive" margin-bottom="1pt" margin-left="6pt" margin-right="8pt" margin-top="1pt" size="100%,36pt,120pt" textAlignment="left"/>
<style border-left="none" border-left-color="black" color2="transparent" id="tickFrameStyle3"/>
<style color="transparent" id="axis4style"/>
<style color="black" font-family="SansSerif" font-size="9pt" font-weight="regular" id="style4" labelLocationVertical="positive" margin-bottom="1pt" margin-left="6pt" margin-right="8pt" margin-top="1pt" textAlignment="left" visible="false"/>
<style color2="transparent" id="tickFrameStyle4"/>
<style id="axis4_LabelStyle" labelAngle="0" visible="false"/>
<style color2="transparent" id="axis4_LabelStylelabelFrame"/>
<style color="transparent" id="axis5style"/>
<style color="black" font-family="SansSerif" font-size="9pt" font-weight="regular" id="style5" labelLocationVertical="positive" margin-bottom="1pt" margin-left="6pt" margin-right="8pt" margin-top="1pt" size="100%,36pt,120pt" textAlignment="left"/>
<style border-right="none" border-right-color="black" color2="transparent" id="tickFrameStyle5"/>
<style color="transparent" id="axis6style"/>
<style color="black" font-family="SansSerif" font-size="9pt" font-weight="regular" id="style6" labelLocationVertical="positive" margin-bottom="1pt" margin-left="6pt" margin-right="8pt" margin-top="1pt" textAlignment="left" visible="false"/>
<style color2="transparent" id="tickFrameStyle6"/>
<style id="axis6_LabelStyle" labelAngle="0" visible="false"/>
<style color2="transparent" id="axis6_LabelStylelabelFrame"/>
<style color2="transparent" id="intervalstyle"/>
<style id="labeling_style_tableProperties"/>
<style id="interval_style_tableProperties"/>
<style border-bottom="thick" border-bottom-color="black" border-left="none" border-right="thick" border-right-color="black" border-top="none" id="style_2403"/>
<style color="black" font-family="SansSerif" font-size="9pt" font-weight="regular" id="style_2404" labelLocationVertical="center" margin-bottom="1pt" margin-left="6pt" margin-right="8pt" margin-top="1pt" textAlignment="mixed"/>
<style border-bottom="none" border-bottom-color="black" border-left="none" border-right="none" border-top="none" id="style_2406"/>
<style border-bottom="none" border-bottom-color="black" border-left="none" border-right="none" border-top="none" id="style_2408"/>
<style border-bottom="none" border-left="none" border-right="solid" border-right-color="black" border-top="none" id="style_2410"/>
<style border-bottom="solid" border-bottom-color="black" border-left="none" border-right="none" border-top="none" id="style_2412"/>
</visualization>
