# Supplementary material for: Hypoxia-Activated PI3K/Akt Inhibits Oxidative Stress via the Regulation of Reactive Oxygen Species in Human Dental Pulp Cells
Source: Hindawi journal article supplement (doi:10.1155/2019/6595189), 2019-01-09
Supplement: f2 [file 6595189.f2.spv › 000000000161_6065236557790976278_table.xml]

<?xml version="1.0" encoding="UTF-8"?>
<visualization creator="160000" date="2018-10-22" id="visualization_2723" lang="zh-CN" name="Multiple Comparisons" style="visualizationStyle" type="0.047" version="2.4" xmlns="http://xml.spss.com/visualization" xmlns:xsi="http://www.w3.org/2001/XMLSchema-instance" xsi:schemaLocation="http://xml.spss.com/visualization http://xml.spss.com/visualization/vizml-2.4.xsd">
<!--  Data  -->
<userSource id="tableData" missing="listwise"/>
<derivedVariable categorical="true" dependsOn="dimension0categories" id="dimension0" value="constant(dimension0)"/>
<sourceVariable categorical="true" id="dimension0categories" label="Dependent Variable" source="tableData" sourceName="dimension0categories"><stringFormat><relabel from="0" to="earlyapoptosis"/><relabel from="1" to="lateapoptosis"/><relabel from="2" to="apoptosis"/></stringFormat></sourceVariable>
<derivedVariable categorical="true" dependsOn="dimension1categories" id="dimension1" value="constant(dimension1)"/>
<sourceVariable categorical="true" id="dimension1categories" label="Test" source="tableData" sourceName="dimension1categories"><extension from="0" helpId="least_significant_difference" id="extension_2730"/><extension from="1" helpId="bonferroni" id="extension_2731"/><extension from="2" helpId="dunnetts_t3_post_hoc" id="extension_2732"/><stringFormat><relabel from="0" to="LSD"/><relabel from="1" to="Bonferroni"/><relabel from="2" to="Dunnett T3"/></stringFormat></sourceVariable>
<derivedVariable categorical="true" dependsOn="dimension2categories" id="dimension2" value="constant(dimension2)"/>
<sourceVariable categorical="true" id="dimension2categories" label="(I) group" source="tableData" sourceName="dimension2categories"><stringFormat><relabel from="0" to="1"/><relabel from="1" to="2"/><relabel from="2" to="3"/><relabel from="3" to="4"/></stringFormat></sourceVariable>
<derivedVariable categorical="true" dependsOn="dimension3categories" id="dimension3" value="constant(dimension3)"/>
<sourceVariable categorical="true" id="dimension3categories" label="(J) group" source="tableData" sourceName="dimension3categories"><stringFormat><relabel from="1" to="2"/><relabel from="2" to="3"/><relabel from="3" to="4"/><relabel from="0" to="1"/></stringFormat></sourceVariable>
<derivedVariable categorical="true" dependsOn="dimension4categories" id="dimension4" value="constant(dimension4)"/>
<sourceVariable categorical="true" id="dimension4categories" label="Statistics" source="tableData" sourceName="dimension4categories"><extension from="0" helpId="mean_difference_i-j" id="extension_2742"/><extension from="1" helpId="standard_error" id="extension_2743"/><extension from="2" helpId="significance_level" id="extension_2744"/><extension from="3" helpId="lower_bound" id="extension_2745"/><extension from="4" helpId="upper_bound" id="extension_2746"/><stringFormat><relabel from="0" to="Mean Difference (I-J)"/><relabel from="1" to="Std. Error"/><relabel from="2" to="Sig."/><relabel from="3" to="Lower Bound"/><relabel from="4" to="Upper Bound"/></stringFormat></sourceVariable>
<derivedVariable categorical="true" dependsOn="dimension4categories" id="dimension4group0map" value="map(dimension4group0)"><stringFormat><relabel from="3" to="95% Confidence Interval"/><relabel from="0" to=""/><relabel from="1" to=""/><relabel from="2" to=""/></stringFormat><valueMapEntry from="3;4" id="valueMapEntry_2750" to="3"/><valueMapEntry from="0" id="valueMapEntry_2751" to="0"/><valueMapEntry from="1" id="valueMapEntry_2752" to="1"/><valueMapEntry from="2" id="valueMapEntry_2753" to="2"/></derivedVariable>
<sourceVariable categorical="true" id="dimension4group0" source="tableData" sourceName="dimension4group0"/>
<sourceVariable categorical="true" id="cell" source="tableData" sourceName="cell"><stringFormat><relabel from="-1.797693134862316E300" to="."/></stringFormat></sourceVariable>
<!--  Structure  -->
<graph cellStyle="cellStyle" id="graph" style="graphStyle"><!--  Size  -->
<location id="location_2758" method="sizeToContent" part="height"/>
<location id="location_2759" method="sizeToContent" part="width"/>
<location id="location_2760" method="fixed" part="left" value="0px"/>
<location id="location_2761" method="attach" part="top" target="title"/>
<location id="location_2762" method="attach" part="bottom" target="captionAndFootnotes"/>
<coordinates id="coordinates"/><faceting id="faceting"><cross id="cross_2765"><nest id="nest_2766"><variableReference ref="dimension4categories"/><variableReference ref="dimension4group0map"/><variableReference ref="dimension4"/></nest><nest id="nest_2770"><variableReference ref="dimension3categories"/><variableReference ref="dimension3"/><variableReference ref="dimension2categories"/><variableReference ref="dimension2"/><variableReference ref="dimension1categories"/><variableReference ref="dimension1"/><variableReference ref="dimension0categories"/><variableReference ref="dimension0"/></nest></cross></faceting><facetLayout id="facetLayout_2779"><tableLayout fitCells="ticks" id="tableLayout_2780" style="style_3149" verticalTitlesInCorner="true"/><facetLevel gap="0pt" id="dimension4categories_facetLevel" level="1"><axis id="axis_2782" style="axis1style"><majorTicks id="dimension4categories_facetLevelmajorTicks" labelAngle="0" length="0" style="style1" tickFrameStyle="tickFrameStyle1"><gridline id="gridline_3159" style="style_3160" zOrder="29"/></majorTicks></axis></facetLevel><facetLevel gap="0pt" id="dimension4group0map_facetLevel" level="2"><axis id="axis_2785" style="axis2style"><majorTicks id="dimension4group0map_facetLevelmajorTicks" labelAngle="0" length="0" style="style2" tickFrameStyle="tickFrameStyle2"><gridline id="gridline_3161" style="style_3162" zOrder="29"/></majorTicks></axis></facetLevel><facetLevel gap="0pt" id="dimension4_facetLevel" level="3"><axis id="axis_2788" style="axis3style"><label id="label_2789" style="axis3_LabelStyle" textFrameStyle="axis3_LabelStylelabelFrame"><text id="text_2790">Statistics</text></label><majorTicks id="dimension4_facetLevelmajorTicks" labelAngle="0" length="0" style="style3" tickFrameStyle="tickFrameStyle3"/></axis></facetLevel><facetLevel gap="0pt" id="dimension3categories_facetLevel" level="4"><axis id="axis_2793" style="axis4style"><majorTicks id="dimension3categories_facetLevelmajorTicks" labelAngle="0" length="0" style="style4" tickFrameStyle="tickFrameStyle4"><gridline id="gridline_3151" style="style_3152" zOrder="28"/></majorTicks></axis></facetLevel><facetLevel gap="0pt" id="dimension3_facetLevel" level="5"><axis id="axis_2796" style="axis5style"><label id="label_2797" style="axis5_LabelStyle" textFrameStyle="axis5_LabelStylelabelFrame"><text id="text_2798">(J) group</text></label><majorTicks id="dimension3_facetLevelmajorTicks" labelAngle="0" length="0" style="style5" tickFrameStyle="tickFrameStyle5"/></axis></facetLevel><facetLevel gap="0pt" id="dimension2categories_facetLevel" level="6"><axis id="axis_2801" style="axis6style"><majorTicks id="dimension2categories_facetLevelmajorTicks" labelAngle="0" length="0" style="style6" tickFrameStyle="tickFrameStyle6"><gridline id="gridline_3163" style="style_3164" zOrder="30"/></majorTicks></axis></facetLevel><facetLevel gap="0pt" id="dimension2_facetLevel" level="7"><axis id="axis_2804" style="axis7style"><label id="label_2805" style="axis7_LabelStyle" textFrameStyle="axis7_LabelStylelabelFrame"><text id="text_2806">(I) group</text></label><majorTicks id="dimension2_facetLevelmajorTicks" labelAngle="0" length="0" style="style7" tickFrameStyle="tickFrameStyle7"/></axis></facetLevel><facetLevel gap="0pt" id="dimension1categories_facetLevel" level="8"><axis id="axis_2809" style="axis8style"><majorTicks id="dimension1categories_facetLevelmajorTicks" labelAngle="0" length="0" style="style8" tickFrameStyle="tickFrameStyle8"><gridline id="gridline_3165" style="style_3166" zOrder="30"/></majorTicks></axis></facetLevel><facetLevel gap="0pt" id="dimension1_facetLevel" level="9"><axis id="axis_2812" style="axis9style"><label id="label_2813" style="axis9_LabelStyle" textFrameStyle="axis9_LabelStylelabelFrame"><text id="text_2814">Test</text></label><majorTicks id="dimension1_facetLevelmajorTicks" labelAngle="0" length="0" style="style9" tickFrameStyle="tickFrameStyle9"/></axis></facetLevel><facetLevel gap="0pt" id="dimension0categories_facetLevel" level="10"><axis id="axis_2817" style="axis10style"><majorTicks id="dimension0categories_facetLevelmajorTicks" labelAngle="0" length="0" style="style10" tickFrameStyle="tickFrameStyle10"><gridline id="gridline_3167" style="style_3168" zOrder="30"/></majorTicks></axis></facetLevel><facetLevel gap="0pt" id="dimension0_facetLevel" level="11"><axis id="axis_2820" style="axis11style"><label id="label_2821" style="axis11_LabelStyle" textFrameStyle="axis11_LabelStylelabelFrame"><text id="text_2822">Dependent Variable</text></label><majorTicks id="dimension0_facetLevelmajorTicks" labelAngle="0" length="0" style="style11" tickFrameStyle="tickFrameStyle11"/></axis></facetLevel><setCellProperties applyToConverse="true" id="tableProperties"><setMetaData id="setMetaData_2825" key="cellPropId" target="graph" value="tableProperties"/><setStyle id="setStyle_2826" style="labeling_style_tableProperties" target="labeling"/><setStyle id="setStyle_2827" style="interval_style_tableProperties" target="interval"/><setFormat id="setFormat_2828" target="labeling"><numberFormat maximumFractionDigits="4" minimumFractionDigits="4" minimumIntegerDigits="0" scientific="onlyForSmall" small="0" useGrouping="false"/></setFormat></setCellProperties><setCellProperties id="columnProp_0"><setMetaData id="setMetaData_2831" key="cellPropId" target="graph" value="columnProp_0"/><setFormat id="setFormat_2832" target="labeling"><numberFormat maximumFractionDigits="5" minimumFractionDigits="5" minimumIntegerDigits="0" scientific="onlyForSmall" small="0" useGrouping="false"/></setFormat><union id="union_2834"><intersect id="intersect_2835"><where id="where_2836" include="0" variable="dimension4categories"/></intersect></union></setCellProperties><setCellProperties id="cellProp_0"><setMetaData id="setMetaData_2838" key="cellPropId" target="graph" value="cellProp_0"/><setFormat id="setFormat_2839" target="labeling"><numberFormat maximumFractionDigits="5" minimumFractionDigits="5" minimumIntegerDigits="0" scientific="onlyForSmall" small="0" useGrouping="false"><affix definesReference="1" id="affix_2841" position="superscript" suffix="true" value="*"/></numberFormat></setFormat><union id="union_2842"><intersect id="intersect_2843"><where id="where_2844" include="0" variable="dimension0categories"/><where id="where_2845" include="0" variable="dimension1categories"/><where id="where_2846" include="1" variable="dimension2categories"/><where id="where_2847" include="2" variable="dimension3categories"/><where id="where_2848" include="0" variable="dimension4categories"/></intersect><intersect id="intersect_2849"><where id="where_2850" include="0" variable="dimension0categories"/><where id="where_2851" include="0" variable="dimension1categories"/><where id="where_2852" include="2" variable="dimension2categories"/><where id="where_2853" include="1" variable="dimension3categories"/><where id="where_2854" include="0" variable="dimension4categories"/></intersect><intersect id="intersect_2855"><where id="where_2856" include="0" variable="dimension0categories"/><where id="where_2857" include="2" variable="dimension1categories"/><where id="where_2858" include="1" variable="dimension2categories"/><where id="where_2859" include="3" variable="dimension3categories"/><where id="where_2860" include="0" variable="dimension4categories"/></intersect><intersect id="intersect_2861"><where id="where_2862" include="0" variable="dimension0categories"/><where id="where_2863" include="2" variable="dimension1categories"/><where id="where_2864" include="3" variable="dimension2categories"/><where id="where_2865" include="1" variable="dimension3categories"/><where id="where_2866" include="0" variable="dimension4categories"/></intersect><intersect id="intersect_2867"><where id="where_2868" include="1" variable="dimension0categories"/><where id="where_2869" include="0" variable="dimension1categories"/><where id="where_2870" include="0" variable="dimension2categories"/><where id="where_2871" include="1" variable="dimension3categories"/><where id="where_2872" include="0" variable="dimension4categories"/></intersect><intersect id="intersect_2873"><where id="where_2874" include="1" variable="dimension0categories"/><where id="where_2875" include="0" variable="dimension1categories"/><where id="where_2876" include="0" variable="dimension2categories"/><where id="where_2877" include="3" variable="dimension3categories"/><where id="where_2878" include="0" variable="dimension4categories"/></intersect><intersect id="intersect_2879"><where id="where_2880" include="1" variable="dimension0categories"/><where id="where_2881" include="0" variable="dimension1categories"/><where id="where_2882" include="1" variable="dimension2categories"/><where id="where_2883" include="0" variable="dimension3categories"/><where id="where_2884" include="0" variable="dimension4categories"/></intersect><intersect id="intersect_2885"><where id="where_2886" include="1" variable="dimension0categories"/><where id="where_2887" include="0" variable="dimension1categories"/><where id="where_2888" include="1" variable="dimension2categories"/><where id="where_2889" include="2" variable="dimension3categories"/><where id="where_2890" include="0" variable="dimension4categories"/></intersect><intersect id="intersect_2891"><where id="where_2892" include="1" variable="dimension0categories"/><where id="where_2893" include="0" variable="dimension1categories"/><where id="where_2894" include="2" variable="dimension2categories"/><where id="where_2895" include="1" variable="dimension3categories"/><where id="where_2896" include="0" variable="dimension4categories"/></intersect><intersect id="intersect_2897"><where id="where_2898" include="1" variable="dimension0categories"/><where id="where_2899" include="0" variable="dimension1categories"/><where id="where_2900" include="2" variable="dimension2categories"/><where id="where_2901" include="3" variable="dimension3categories"/><where id="where_2902" include="0" variable="dimension4categories"/></intersect><intersect id="intersect_2903"><where id="where_2904" include="1" variable="dimension0categories"/><where id="where_2905" include="0" variable="dimension1categories"/><where id="where_2906" include="3" variable="dimension2categories"/><where id="where_2907" include="0" variable="dimension3categories"/><where id="where_2908" include="0" variable="dimension4categories"/></intersect><intersect id="intersect_2909"><where id="where_2910" include="1" variable="dimension0categories"/><where id="where_2911" include="0" variable="dimension1categories"/><where id="where_2912" include="3" variable="dimension2categories"/><where id="where_2913" include="2" variable="dimension3categories"/><where id="where_2914" include="0" variable="dimension4categories"/></intersect><intersect id="intersect_2915"><where id="where_2916" include="1" variable="dimension0categories"/><where id="where_2917" include="1" variable="dimension1categories"/><where id="where_2918" include="0" variable="dimension2categories"/><where id="where_2919" include="1" variable="dimension3categories"/><where id="where_2920" include="0" variable="dimension4categories"/></intersect><intersect id="intersect_2921"><where id="where_2922" include="1" variable="dimension0categories"/><where id="where_2923" include="1" variable="dimension1categories"/><where id="where_2924" include="1" variable="dimension2categories"/><where id="where_2925" include="0" variable="dimension3categories"/><where id="where_2926" include="0" variable="dimension4categories"/></intersect><intersect id="intersect_2927"><where id="where_2928" include="1" variable="dimension0categories"/><where id="where_2929" include="1" variable="dimension1categories"/><where id="where_2930" include="1" variable="dimension2categories"/><where id="where_2931" include="2" variable="dimension3categories"/><where id="where_2932" include="0" variable="dimension4categories"/></intersect><intersect id="intersect_2933"><where id="where_2934" include="1" variable="dimension0categories"/><where id="where_2935" include="1" variable="dimension1categories"/><where id="where_2936" include="2" variable="dimension2categories"/><where id="where_2937" include="1" variable="dimension3categories"/><where id="where_2938" include="0" variable="dimension4categories"/></intersect><intersect id="intersect_2939"><where id="where_2940" include="1" variable="dimension0categories"/><where id="where_2941" include="1" variable="dimension1categories"/><where id="where_2942" include="2" variable="dimension2categories"/><where id="where_2943" include="3" variable="dimension3categories"/><where id="where_2944" include="0" variable="dimension4categories"/></intersect><intersect id="intersect_2945"><where id="where_2946" include="1" variable="dimension0categories"/><where id="where_2947" include="1" variable="dimension1categories"/><where id="where_2948" include="3" variable="dimension2categories"/><where id="where_2949" include="2" variable="dimension3categories"/><where id="where_2950" include="0" variable="dimension4categories"/></intersect><intersect id="intersect_2951"><where id="where_2952" include="1" variable="dimension0categories"/><where id="where_2953" include="2" variable="dimension1categories"/><where id="where_2954" include="1" variable="dimension2categories"/><where id="where_2955" include="2" variable="dimension3categories"/><where id="where_2956" include="0" variable="dimension4categories"/></intersect><intersect id="intersect_2957"><where id="where_2958" include="1" variable="dimension0categories"/><where id="where_2959" include="2" variable="dimension1categories"/><where id="where_2960" include="2" variable="dimension2categories"/><where id="where_2961" include="1" variable="dimension3categories"/><where id="where_2962" include="0" variable="dimension4categories"/></intersect><intersect id="intersect_2963"><where id="where_2964" include="2" variable="dimension0categories"/><where id="where_2965" include="0" variable="dimension1categories"/><where id="where_2966" include="0" variable="dimension2categories"/><where id="where_2967" include="1" variable="dimension3categories"/><where id="where_2968" include="0" variable="dimension4categories"/></intersect><intersect id="intersect_2969"><where id="where_2970" include="2" variable="dimension0categories"/><where id="where_2971" include="0" variable="dimension1categories"/><where id="where_2972" include="1" variable="dimension2categories"/><where id="where_2973" include="0" variable="dimension3categories"/><where id="where_2974" include="0" variable="dimension4categories"/></intersect><intersect id="intersect_2975"><where id="where_2976" include="2" variable="dimension0categories"/><where id="where_2977" include="0" variable="dimension1categories"/><where id="where_2978" include="1" variable="dimension2categories"/><where id="where_2979" include="2" variable="dimension3categories"/><where id="where_2980" include="0" variable="dimension4categories"/></intersect><intersect id="intersect_2981"><where id="where_2982" include="2" variable="dimension0categories"/><where id="where_2983" include="0" variable="dimension1categories"/><where id="where_2984" include="2" variable="dimension2categories"/><where id="where_2985" include="1" variable="dimension3categories"/><where id="where_2986" include="0" variable="dimension4categories"/></intersect><intersect id="intersect_2987"><where id="where_2988" include="2" variable="dimension0categories"/><where id="where_2989" include="0" variable="dimension1categories"/><where id="where_2990" include="2" variable="dimension2categories"/><where id="where_2991" include="3" variable="dimension3categories"/><where id="where_2992" include="0" variable="dimension4categories"/></intersect><intersect id="intersect_2993"><where id="where_2994" include="2" variable="dimension0categories"/><where id="where_2995" include="0" variable="dimension1categories"/><where id="where_2996" include="3" variable="dimension2categories"/><where id="where_2997" include="2" variable="dimension3categories"/><where id="where_2998" include="0" variable="dimension4categories"/></intersect><intersect id="intersect_2999"><where id="where_3000" include="2" variable="dimension0categories"/><where id="where_3001" include="1" variable="dimension1categories"/><where id="where_3002" include="0" variable="dimension2categories"/><where id="where_3003" include="1" variable="dimension3categories"/><where id="where_3004" include="0" variable="dimension4categories"/></intersect><intersect id="intersect_3005"><where id="where_3006" include="2" variable="dimension0categories"/><where id="where_3007" include="1" variable="dimension1categories"/><where id="where_3008" include="1" variable="dimension2categories"/><where id="where_3009" include="0" variable="dimension3categories"/><where id="where_3010" include="0" variable="dimension4categories"/></intersect><intersect id="intersect_3011"><where id="where_3012" include="2" variable="dimension0categories"/><where id="where_3013" include="1" variable="dimension1categories"/><where id="where_3014" include="1" variable="dimension2categories"/><where id="where_3015" include="2" variable="dimension3categories"/><where id="where_3016" include="0" variable="dimension4categories"/></intersect><intersect id="intersect_3017"><where id="where_3018" include="2" variable="dimension0categories"/><where id="where_3019" include="1" variable="dimension1categories"/><where id="where_3020" include="2" variable="dimension2categories"/><where id="where_3021" include="1" variable="dimension3categories"/><where id="where_3022" include="0" variable="dimension4categories"/></intersect><intersect id="intersect_3023"><where id="where_3024" include="2" variable="dimension0categories"/><where id="where_3025" include="1" variable="dimension1categories"/><where id="where_3026" include="2" variable="dimension2categories"/><where id="where_3027" include="3" variable="dimension3categories"/><where id="where_3028" include="0" variable="dimension4categories"/></intersect><intersect id="intersect_3029"><where id="where_3030" include="2" variable="dimension0categories"/><where id="where_3031" include="1" variable="dimension1categories"/><where id="where_3032" include="3" variable="dimension2categories"/><where id="where_3033" include="2" variable="dimension3categories"/><where id="where_3034" include="0" variable="dimension4categories"/></intersect><intersect id="intersect_3035"><where id="where_3036" include="2" variable="dimension0categories"/><where id="where_3037" include="2" variable="dimension1categories"/><where id="where_3038" include="1" variable="dimension2categories"/><where id="where_3039" include="3" variable="dimension3categories"/><where id="where_3040" include="0" variable="dimension4categories"/></intersect><intersect id="intersect_3041"><where id="where_3042" include="2" variable="dimension0categories"/><where id="where_3043" include="2" variable="dimension1categories"/><where id="where_3044" include="3" variable="dimension2categories"/><where id="where_3045" include="1" variable="dimension3categories"/><where id="where_3046" include="0" variable="dimension4categories"/></intersect></union></setCellProperties><setCellProperties id="columnProp_1"><setMetaData id="setMetaData_3048" key="cellPropId" target="graph" value="columnProp_1"/><setFormat id="setFormat_3049" target="labeling"><numberFormat maximumFractionDigits="5" minimumFractionDigits="5" minimumIntegerDigits="0" scientific="onlyForSmall" small="0" useGrouping="false"/></setFormat><union id="union_3051"><intersect id="intersect_3052"><where id="where_3053" include="1" variable="dimension4categories"/></intersect></union></setCellProperties><setCellProperties id="columnProp_2"><setMetaData id="setMetaData_3055" key="cellPropId" target="graph" value="columnProp_2"/><setFormat id="setFormat_3056" target="labeling"><numberFormat maximumFractionDigits="3" minimumFractionDigits="3" minimumIntegerDigits="0" scientific="onlyForSmall" small="0" useGrouping="false"/></setFormat><union id="union_3058"><intersect id="intersect_3059"><where id="where_3060" include="2" variable="dimension4categories"/></intersect></union></setCellProperties></facetLayout><interval id="interval" style="intervalstyle"><labeling id="labeling" style="style_3150" variable="cell"/></interval></graph>
<labelFrame id="title" style="titlestyle"><!--  Size  -->
<location id="location_3064" method="fixed" part="top" value="0%"/>
<location id="location_3065" method="sizeToContent" part="height"/>
<label id="label_3066" purpose="title" style="titleLabelStyle"><text id="text_3067">Multiple Comparisons</text></label></labelFrame>
<container id="captionAndFootnotes" style="captionAndFootnotesstyle"><!--  Size  -->
<location id="location_3069" method="sizeToContent" part="height"/>
<location id="location_3070" method="fixed" part="bottom" value="100%"/>
<labelFrame id="footnote_0" style="footnote_0style"><!--  Size  -->
<location id="location_3072" method="fixed" part="top" value="0%"/>
<location id="location_3073" method="sizeToContent" part="height"/>
<location id="location_3074" method="sizeToContent" part="width"/>
<location id="location_3075" method="fixed" part="left" value="0px"/>
<label id="label_3076" purpose="footnote" style="footnote_0labelstyle"><text id="text_3077" usesReference="1">*. </text><text id="text_3078" usesReference="1">The mean difference is significant at the 0.05 level.</text></label></labelFrame></container>
<!--  Styles  -->
<style border-bottom="none" border-bottom-color="black" border-left="none" border-left-color="black" border-right="none" border-right-color="black" border-top="none" border-top-color="black" id="visualizationStyle"/>
<style border-bottom="thick" border-bottom-color="black" border-left="thick" border-left-color="black" border-right="thick" border-right-color="black" border-top="thick" border-top-color="black" id="graphStyle"/>
<style border-bottom="none" border-left="none" border-right="none" border-top="none" id="cellStyle" width="100%,50pt,72pt"/>
<style id="titlestyle"/>
<style color="black" font-family="SansSerif" font-size="9pt" font-weight="bold" id="titleLabelStyle" labelLocationVertical="center" margin-bottom="6pt" margin-left="6pt" margin-right="8pt" margin-top="1pt" textAlignment="center"/>
<style color="transparent" id="axis1style"/>
<style color="black" font-family="SansSerif" font-size="9pt" font-weight="regular" id="style1" labelLocationVertical="negative" margin-bottom="2pt" margin-left="6pt" margin-right="8pt" margin-top="1pt" textAlignment="center"/>
<style border-top="solid" border-top-color="black" color2="transparent" id="tickFrameStyle1"/>
<style color="transparent" id="axis2style"/>
<style color="black" font-family="SansSerif" font-size="9pt" font-weight="regular" id="style2" labelLocationVertical="negative" margin-bottom="2pt" margin-left="6pt" margin-right="8pt" margin-top="1pt" textAlignment="center"/>
<style border-bottom="solid" border-bottom-color="black" border-top="solid" border-top-color="black" color2="transparent" id="tickFrameStyle2"/>
<style color="transparent" id="axis3style"/>
<style color="black" font-family="SansSerif" font-size="9pt" font-weight="regular" id="style3" labelLocationVertical="negative" margin-bottom="2pt" margin-left="6pt" margin-right="8pt" margin-top="1pt" textAlignment="center" visible="false"/>
<style color2="transparent" id="tickFrameStyle3"/>
<style color="black" font-family="SansSerif" font-size="9pt" font-weight="regular" id="axis3_LabelStyle" labelAngle="0" labelLocationVertical="negative" margin-bottom="2pt" margin-left="6pt" margin-right="8pt" margin-top="1pt" textAlignment="center" visible="false"/>
<style color2="transparent" id="axis3_LabelStylelabelFrame"/>
<style color="transparent" id="axis4style"/>
<style color="black" font-family="SansSerif" font-size="9pt" font-weight="regular" id="style4" labelLocationVertical="positive" margin-bottom="1pt" margin-left="6pt" margin-right="8pt" margin-top="1pt" size="100%,36pt,120pt" textAlignment="left"/>
<style border-left="none" border-left-color="black" color2="transparent" id="tickFrameStyle4"/>
<style color="transparent" id="axis5style"/>
<style color="black" font-family="SansSerif" font-size="9pt" font-weight="regular" id="style5" labelLocationVertical="positive" margin-bottom="1pt" margin-left="6pt" margin-right="8pt" margin-top="1pt" textAlignment="left" visible="false"/>
<style color2="transparent" id="tickFrameStyle5"/>
<style color="black" font-family="SansSerif" font-size="9pt" font-weight="regular" id="axis5_LabelStyle" labelAngle="0" labelLocationVertical="negative" margin-bottom="1pt" margin-left="6pt" margin-right="8pt" margin-top="1pt" textAlignment="left"/>
<style color2="transparent" id="axis5_LabelStylelabelFrame"/>
<style color="transparent" id="axis6style"/>
<style color="black" font-family="SansSerif" font-size="9pt" font-weight="regular" id="style6" labelLocationVertical="positive" margin-bottom="1pt" margin-left="6pt" margin-right="8pt" margin-top="1pt" size="100%,36pt,120pt" textAlignment="left"/>
<style border-left="none" border-left-color="black" border-right="none" border-right-color="black" color2="transparent" id="tickFrameStyle6"/>
<style color="transparent" id="axis7style"/>
<style color="black" font-family="SansSerif" font-size="9pt" font-weight="regular" id="style7" labelLocationVertical="positive" margin-bottom="1pt" margin-left="6pt" margin-right="8pt" margin-top="1pt" textAlignment="left" visible="false"/>
<style color2="transparent" id="tickFrameStyle7"/>
<style color="black" font-family="SansSerif" font-size="9pt" font-weight="regular" id="axis7_LabelStyle" labelAngle="0" labelLocationVertical="negative" margin-bottom="1pt" margin-left="6pt" margin-right="8pt" margin-top="1pt" textAlignment="left"/>
<style color2="transparent" id="axis7_LabelStylelabelFrame"/>
<style color="transparent" id="axis8style"/>
<style color="black" font-family="SansSerif" font-size="9pt" font-weight="regular" id="style8" labelLocationVertical="positive" margin-bottom="1pt" margin-left="6pt" margin-right="8pt" margin-top="1pt" size="100%,36pt,120pt" textAlignment="left"/>
<style border-left="none" border-left-color="black" border-right="none" border-right-color="black" color2="transparent" id="tickFrameStyle8"/>
<style color="transparent" id="axis9style"/>
<style color="black" font-family="SansSerif" font-size="9pt" font-weight="regular" id="style9" labelLocationVertical="positive" margin-bottom="1pt" margin-left="6pt" margin-right="8pt" margin-top="1pt" textAlignment="left" visible="false"/>
<style color2="transparent" id="tickFrameStyle9"/>
<style color="black" font-family="SansSerif" font-size="9pt" font-weight="regular" id="axis9_LabelStyle" labelAngle="0" labelLocationVertical="negative" margin-bottom="1pt" margin-left="6pt" margin-right="8pt" margin-top="1pt" textAlignment="left" visible="false"/>
<style color2="transparent" id="axis9_LabelStylelabelFrame"/>
<style color="transparent" id="axis10style"/>
<style color="black" font-family="SansSerif" font-size="9pt" font-weight="regular" id="style10" labelLocationVertical="positive" margin-bottom="1pt" margin-left="6pt" margin-right="8pt" margin-top="1pt" size="100%,36pt,120pt" textAlignment="left"/>
<style border-right="none" border-right-color="black" color2="transparent" id="tickFrameStyle10"/>
<style color="transparent" id="axis11style"/>
<style color="black" font-family="SansSerif" font-size="9pt" font-weight="regular" id="style11" labelLocationVertical="positive" margin-bottom="1pt" margin-left="6pt" margin-right="8pt" margin-top="1pt" textAlignment="left" visible="false"/>
<style color2="transparent" id="tickFrameStyle11"/>
<style color="black" font-family="SansSerif" font-size="9pt" font-weight="regular" id="axis11_LabelStyle" labelAngle="0" labelLocationVertical="negative" margin-bottom="1pt" margin-left="6pt" margin-right="8pt" margin-top="1pt" textAlignment="left"/>
<style color2="transparent" id="axis11_LabelStylelabelFrame"/>
<style color2="transparent" id="intervalstyle"/>
<style id="labeling_style_tableProperties"/>
<style id="interval_style_tableProperties"/>
<style id="captionAndFootnotesstyle"/>
<style id="footnote_0style"/>
<style color="black" font-family="SansSerif" font-size="9pt" font-weight="regular" id="footnote_0labelstyle" labelLocationHorizontal="negative" labelLocationVertical="positive" margin-bottom="2pt" margin-left="18pt" margin-right="18pt" margin-top="2pt" textAlignment="left"/>
<style border-bottom="thick" border-bottom-color="black" border-left="none" border-right="thick" border-right-color="black" border-top="none" id="style_3149"/>
<style color="black" font-family="SansSerif" font-size="9pt" font-weight="regular" id="style_3150" labelLocationVertical="center" margin-bottom="1pt" margin-left="6pt" margin-right="8pt" margin-top="1pt" textAlignment="mixed"/>
<style border-bottom="none" border-bottom-color="black" border-left="none" border-right="none" border-top="none" id="style_3152"/>
<style border-bottom="none" border-bottom-color="black" border-left="none" border-right="none" border-top="none" id="style_3154"/>
<style border-bottom="none" border-bottom-color="black" border-left="none" border-right="none" border-top="none" id="style_3156"/>
<style border-bottom="none" border-bottom-color="black" border-left="none" border-right="none" border-top="none" id="style_3158"/>
<style border-bottom="none" border-left="none" border-right="solid" border-right-color="black" border-top="none" id="style_3160"/>
<style border-bottom="none" border-left="none" border-right="solid" border-right-color="black" border-top="none" id="style_3162"/>
<style border-bottom="solid" border-bottom-color="black" border-left="none" border-right="none" border-top="none" id="style_3164"/>
<style border-bottom="solid" border-bottom-color="black" border-left="none" border-right="none" border-top="none" id="style_3166"/>
<style border-bottom="solid" border-bottom-color="black" border-left="none" border-right="none" border-top="none" id="style_3168"/>
</visualization>
