# Supplementary material for: Hypoxia-Activated PI3K/Akt Inhibits Oxidative Stress via the Regulation of Reactive Oxygen Species in Human Dental Pulp Cells
Source: Hindawi journal article supplement (doi:10.1155/2019/6595189), 2019-01-09
Supplement: f2 [file 6595189.f2.spv › outputViewer0000000000.xml]

<?xml version="1.0" encoding="UTF-8"?><heading xmlns="http://xml.spss.com/spss/viewer-tree" xmlns:vgr="http://xml.spss.com/spss/viewer-graph" xmlns:vizml="http://xml.spss.com/spss/visualization" xmlns:vps="http://xml.spss.com/spss/viewer/pagesetup" xmlns:vst="http://xml.spss.com/spss/viewer-style" xmlns:vtb="http://xml.spss.com/spss/viewer-table" xmlns:vtt="http://xml.spss.com/spss/viewer-treemodel" xmlns:vtx="http://xml.spss.com/spss/viewer-text" xmlns:xsi="http://www.w3.org/2001/XMLSchema-instance" xsi:schemaLocation="http://xml.spss.com/spss/viewer-tree http://xml.spss.com/spss/viewer-tree/viewer-tree-1.0.xsd"><label>Output</label><vps:pageSetup chart-size="as-is" initial-page-number="1" margin-bottom="0.5in" margin-left="0.5in" margin-right="0.5in" margin-top="0.5in" paper-height="11in" paper-width="8.5in" reference-orientation="0deg" space-after="12pt"><vps:pageHeader><vps:pageParagraph><vtx:text xmlns:vtx="http://xml.spss.com/spss/viewer/viewer-text" type="title"><![CDATA[<html xmlns="http://xml.spss.com/spss/viewer/viewer-tree">
<head>

</head>
<body>
<p align="center" style="margin-top: 0">&[PageTitle]</p>
</body>
</html>]]></vtx:text></vps:pageParagraph></vps:pageHeader><vps:pageFooter><vps:pageParagraph><vtx:text xmlns:vtx="http://xml.spss.com/spss/viewer/viewer-text" type="title"><![CDATA[<html xmlns="http://xml.spss.com/spss/viewer/viewer-tree">
<head>

</head>
<body>
<p align="right" style="margin-top: 0">Page &[Page]</p>
</body>
</html>]]></vtx:text></vps:pageParagraph></vps:pageFooter></vps:pageSetup><container visibility="visible"><label>Log</label><vtx:text type="log"><html xmlns="http://www.w3.org/1999/xhtml" lang="en"><![CDATA[<head><style type="text/css">p{color:0;font-family:Monospaced;font-size:13pt;font-style:normal;font-weight:normal;text-decoration:none}</style></head><BR>ONEWAY&nbsp;earlyapoptosis&nbsp;lateapoptosis&nbsp;apoptosis&nbsp;BY&nbsp;group<BR>&nbsp;&nbsp;/STATISTICS&nbsp;DESCRIPTIVES&nbsp;HOMOGENEITY<BR>&nbsp;&nbsp;/MISSING&nbsp;ANALYSIS<BR>&nbsp;&nbsp;/POSTHOC=LSD&nbsp;BONFERRONI&nbsp;T3&nbsp;ALPHA(0.05).]]></html></vtx:text></container></heading>
