# Supplementary material for: Hypoxia-Activated PI3K/Akt Inhibits Oxidative Stress via the Regulation of Reactive Oxygen Species in Human Dental Pulp Cells
Source: Hindawi journal article supplement (doi:10.1155/2019/6595189), 2019-01-09
Supplement: f2 [file 6595189.f2.spv › outputViewer0000000001_heading.xml]

<?xml version="1.0" encoding="UTF-8"?><heading xmlns="http://xml.spss.com/spss/viewer-tree" xmlns:vgr="http://xml.spss.com/spss/viewer-graph" xmlns:vizml="http://xml.spss.com/spss/visualization" xmlns:vps="http://xml.spss.com/spss/viewer/pagesetup" xmlns:vst="http://xml.spss.com/spss/viewer-style" xmlns:vtb="http://xml.spss.com/spss/viewer-table" xmlns:vtt="http://xml.spss.com/spss/viewer-treemodel" xmlns:vtx="http://xml.spss.com/spss/viewer-text" xmlns:xsi="http://www.w3.org/2001/XMLSchema-instance" xsi:schemaLocation="http://xml.spss.com/spss/viewer-tree http://xml.spss.com/spss/viewer-tree/viewer-tree-1.0.xsd"><label>Output</label><heading commandName="Oneway"><label>Oneway</label><container text-align="left" visibility="visible"><label>Title</label><vtx:text commandName="Oneway" type="title"><html xmlns="http://www.w3.org/1999/xhtml" lang="en"><![CDATA[<head><style type="text/css">p{color:0;font-family:SansSerif;font-size:18pt;font-style:normal;font-weight:bold;text-decoration:none}</style></head><BR>Oneway]]></html></vtx:text></container><container text-align="left" visibility="hidden"><label>Notes</label><vtb:table VDPId="753522272284186902" ViZmlSource="5603054646032079126" commandName="Oneway" subType="Notes" type="note"><tableProperties><generalProperties/><footnoteProperties/><cellFormatProperties><caption><vizml:style/></caption><footnotes><vizml:style/></footnotes><rowLabels><vizml:style/></rowLabels><columnLabels><vizml:style/></columnLabels><data><vizml:style/></data><layers><vizml:style/></layers><title><vizml:style/></title><cornerLabels><vizml:style/></cornerLabels></cellFormatProperties><borderProperties><topInnerFrame/><rightInnerFrame/><horizontalDimensionBorderColumns/><horizontalDimensionBorderRows/><horizontalCategoryBorderColumns/><leftInnerFrame/><verticalDimensionBorderRows/><titleLayerSeparator/><verticalCategoryBorderRows/><topOuterFrame/><bottomInnerFrame/><leftOuterFrame/><dataAreaTop/><verticalDimensionBorderColumns/><dataAreaLeft/><horizontalCategoryBorderRows/><bottomOuterFrame/><rightOuterFrame/><verticalCategoryBorderColumns/></borderProperties><printingProperties/></tableProperties><vtb:tableStructure><vtb:path>00000000011_5603054646032079126_notes.xml</vtb:path><vtb:dataPath>00000000011_5603054646032079126_notesData.bin</vtb:dataPath></vtb:tableStructure></vtb:table></container><container text-align="left" visibility="visible"><label>Active Dataset</label><vtx:text commandName="Oneway" type="text"><html xmlns="http://www.w3.org/1999/xhtml" lang="en"><![CDATA[<head><style type="text/css">p{color:0;font-family:Monospaced;font-size:13pt;font-style:normal;font-weight:normal;text-decoration:none}</style></head><BR>[DataSet1]&nbsp;C:\Users\Thinkpad\Desktop\PAPER\小修回稿\supplementary&nbsp;date&nbsp;1&nbsp;ROS\Apoptosis&nbsp;date（0）.sav]]></html></vtx:text></container><container text-align="left" visibility="visible"><label>Descriptives</label><vtb:table VDPId="7559868684124559638" ViZmlSource="2897235694912542998" commandName="Oneway" subType="Table" tableLookId="tableLookApplied" type="table"><tableProperties><generalProperties hideEmptyRows="true" maximumColumnWidth="72" maximumRowWidth="120" minimumColumnWidth="50" minimumRowWidth="36" rowDimensionLabels="inCorner"/><footnoteProperties markerPosition="superscript" numberFormat="alphabetic"/><cellFormatProperties><caption><vizml:style color="#000000" font-family="SansSerif" font-size="9pt" font-weight="regular" labelLocationVertical="positive" margin-bottom="1pt" margin-left="6pt" margin-right="8pt" margin-top="1pt" textAlignment="left"/></caption><footnotes><vizml:style color="#000000" font-family="SansSerif" font-size="9pt" font-weight="regular" labelLocationVertical="positive" margin-bottom="2pt" margin-left="18pt" margin-right="18pt" margin-top="2pt" textAlignment="left"/></footnotes><rowLabels><vizml:style color="#000000" font-family="SansSerif" font-size="9pt" font-weight="regular" labelLocationVertical="positive" margin-bottom="1pt" margin-left="6pt" margin-right="8pt" margin-top="1pt" textAlignment="left"/></rowLabels><columnLabels><vizml:style color="#000000" font-family="SansSerif" font-size="9pt" font-weight="regular" labelLocationVertical="negative" margin-bottom="2pt" margin-left="6pt" margin-right="8pt" margin-top="1pt" textAlignment="center"/></columnLabels><data><vizml:style color="#000000" font-family="SansSerif" font-size="9pt" font-weight="regular" labelLocationVertical="center" margin-bottom="1pt" margin-left="6pt" margin-right="8pt" margin-top="1pt" textAlignment="mixed"/></data><layers><vizml:style color="#000000" font-family="SansSerif" font-size="9pt" font-weight="regular" labelLocationVertical="negative" margin-bottom="1pt" margin-left="6pt" margin-right="8pt" margin-top="1pt" textAlignment="left"/></layers><title><vizml:style color="#000000" font-family="SansSerif" font-size="9pt" font-weight="bold" labelLocationVertical="center" margin-bottom="6pt" margin-left="6pt" margin-right="8pt" margin-top="1pt" textAlignment="center"/></title><cornerLabels><vizml:style color="#000000" font-family="SansSerif" font-size="9pt" font-weight="regular" labelLocationVertical="negative" margin-bottom="1pt" margin-left="6pt" margin-right="8pt" margin-top="1pt" textAlignment="left"/></cornerLabels></cellFormatProperties><borderProperties><topInnerFrame borderStyleType="thick" color="#000000"/><rightInnerFrame borderStyleType="thick" color="#000000"/><horizontalDimensionBorderColumns borderStyleType="solid" color="#000000"/><horizontalDimensionBorderRows borderStyleType="solid" color="#000000"/><horizontalCategoryBorderColumns borderStyleType="solid" color="#000000"/><leftInnerFrame borderStyleType="thick" color="#000000"/><verticalDimensionBorderRows borderStyleType="none" color="#000000"/><titleLayerSeparator borderStyleType="none" color="#000000"/><verticalCategoryBorderRows borderStyleType="none" color="#000000"/><topOuterFrame borderStyleType="none" color="#000000"/><bottomInnerFrame borderStyleType="thick" color="#000000"/><leftOuterFrame borderStyleType="none" color="#000000"/><dataAreaTop borderStyleType="thick" color="#000000"/><verticalDimensionBorderColumns borderStyleType="solid" color="#000000"/><dataAreaLeft borderStyleType="thick" color="#000000"/><horizontalCategoryBorderRows borderStyleType="none" color="#000000"/><bottomOuterFrame borderStyleType="none" color="#000000"/><rightOuterFrame borderStyleType="none" color="#000000"/><verticalCategoryBorderColumns borderStyleType="solid" color="#000000"/></borderProperties><printingProperties printAllLayers="false" rescaleLongTableToFitPage="false" rescaleWideTableToFitPage="false" windowOrphanLines="2"/></tableProperties><vtb:tableStructure><vtb:path>00000000013_2897235694912542998_table.xml</vtb:path><vtb:dataPath>00000000013_2897235694912542998_tableData.bin</vtb:dataPath></vtb:tableStructure></vtb:table></container><container text-align="left" visibility="visible"><label>Test of Homogeneity of Variances</label><vtb:table VDPId="4052690474309785878" ViZmlSource="6762168600126560534" commandName="Oneway" subType="Table" tableLookId="tableLookApplied" type="table"><tableProperties><generalProperties hideEmptyRows="true" maximumColumnWidth="72" maximumRowWidth="120" minimumColumnWidth="50" minimumRowWidth="36" rowDimensionLabels="inCorner"/><footnoteProperties markerPosition="superscript" numberFormat="alphabetic"/><cellFormatProperties><caption><vizml:style color="#000000" font-family="SansSerif" font-size="9pt" font-weight="regular" labelLocationVertical="positive" margin-bottom="1pt" margin-left="6pt" margin-right="8pt" margin-top="1pt" textAlignment="left"/></caption><footnotes><vizml:style color="#000000" font-family="SansSerif" font-size="9pt" font-weight="regular" labelLocationVertical="positive" margin-bottom="2pt" margin-left="18pt" margin-right="18pt" margin-top="2pt" textAlignment="left"/></footnotes><rowLabels><vizml:style color="#000000" font-family="SansSerif" font-size="9pt" font-weight="regular" labelLocationVertical="positive" margin-bottom="1pt" margin-left="6pt" margin-right="8pt" margin-top="1pt" textAlignment="left"/></rowLabels><columnLabels><vizml:style color="#000000" font-family="SansSerif" font-size="9pt" font-weight="regular" labelLocationVertical="negative" margin-bottom="2pt" margin-left="6pt" margin-right="8pt" margin-top="1pt" textAlignment="center"/></columnLabels><data><vizml:style color="#000000" font-family="SansSerif" font-size="9pt" font-weight="regular" labelLocationVertical="center" margin-bottom="1pt" margin-left="6pt" margin-right="8pt" margin-top="1pt" textAlignment="mixed"/></data><layers><vizml:style color="#000000" font-family="SansSerif" font-size="9pt" font-weight="regular" labelLocationVertical="negative" margin-bottom="1pt" margin-left="6pt" margin-right="8pt" margin-top="1pt" textAlignment="left"/></layers><title><vizml:style color="#000000" font-family="SansSerif" font-size="9pt" font-weight="bold" labelLocationVertical="center" margin-bottom="6pt" margin-left="6pt" margin-right="8pt" margin-top="1pt" textAlignment="center"/></title><cornerLabels><vizml:style color="#000000" font-family="SansSerif" font-size="9pt" font-weight="regular" labelLocationVertical="negative" margin-bottom="1pt" margin-left="6pt" margin-right="8pt" margin-top="1pt" textAlignment="left"/></cornerLabels></cellFormatProperties><borderProperties><topInnerFrame borderStyleType="thick" color="#000000"/><rightInnerFrame borderStyleType="thick" color="#000000"/><horizontalDimensionBorderColumns borderStyleType="solid" color="#000000"/><horizontalDimensionBorderRows borderStyleType="solid" color="#000000"/><horizontalCategoryBorderColumns borderStyleType="solid" color="#000000"/><leftInnerFrame borderStyleType="thick" color="#000000"/><verticalDimensionBorderRows borderStyleType="none" color="#000000"/><titleLayerSeparator borderStyleType="none" color="#000000"/><verticalCategoryBorderRows borderStyleType="none" color="#000000"/><topOuterFrame borderStyleType="none" color="#000000"/><bottomInnerFrame borderStyleType="thick" color="#000000"/><leftOuterFrame borderStyleType="none" color="#000000"/><dataAreaTop borderStyleType="thick" color="#000000"/><verticalDimensionBorderColumns borderStyleType="solid" color="#000000"/><dataAreaLeft borderStyleType="thick" color="#000000"/><horizontalCategoryBorderRows borderStyleType="none" color="#000000"/><bottomOuterFrame borderStyleType="none" color="#000000"/><rightOuterFrame borderStyleType="none" color="#000000"/><verticalCategoryBorderColumns borderStyleType="solid" color="#000000"/></borderProperties><printingProperties printAllLayers="false" rescaleLongTableToFitPage="false" rescaleWideTableToFitPage="false" windowOrphanLines="2"/></tableProperties><vtb:tableStructure><vtb:path>00000000014_6762168600126560534_table.xml</vtb:path><vtb:dataPath>00000000014_6762168600126560534_tableData.bin</vtb:dataPath></vtb:tableStructure></vtb:table></container><container text-align="left" visibility="visible"><label>ANOVA</label><vtb:table VDPId="7897638656177346838" ViZmlSource="8614836896836098326" commandName="Oneway" subType="Table" tableLookId="tableLookApplied" type="table"><tableProperties><generalProperties hideEmptyRows="true" maximumColumnWidth="72" maximumRowWidth="120" minimumColumnWidth="50" minimumRowWidth="36" rowDimensionLabels="inCorner"/><footnoteProperties markerPosition="superscript" numberFormat="alphabetic"/><cellFormatProperties><caption><vizml:style color="#000000" font-family="SansSerif" font-size="9pt" font-weight="regular" labelLocationVertical="positive" margin-bottom="1pt" margin-left="6pt" margin-right="8pt" margin-top="1pt" textAlignment="left"/></caption><footnotes><vizml:style color="#000000" font-family="SansSerif" font-size="9pt" font-weight="regular" labelLocationVertical="positive" margin-bottom="2pt" margin-left="18pt" margin-right="18pt" margin-top="2pt" textAlignment="left"/></footnotes><rowLabels><vizml:style color="#000000" font-family="SansSerif" font-size="9pt" font-weight="regular" labelLocationVertical="positive" margin-bottom="1pt" margin-left="6pt" margin-right="8pt" margin-top="1pt" textAlignment="left"/></rowLabels><columnLabels><vizml:style color="#000000" font-family="SansSerif" font-size="9pt" font-weight="regular" labelLocationVertical="negative" margin-bottom="2pt" margin-left="6pt" margin-right="8pt" margin-top="1pt" textAlignment="center"/></columnLabels><data><vizml:style color="#000000" font-family="SansSerif" font-size="9pt" font-weight="regular" labelLocationVertical="center" margin-bottom="1pt" margin-left="6pt" margin-right="8pt" margin-top="1pt" textAlignment="mixed"/></data><layers><vizml:style color="#000000" font-family="SansSerif" font-size="9pt" font-weight="regular" labelLocationVertical="negative" margin-bottom="1pt" margin-left="6pt" margin-right="8pt" margin-top="1pt" textAlignment="left"/></layers><title><vizml:style color="#000000" font-family="SansSerif" font-size="9pt" font-weight="bold" labelLocationVertical="center" margin-bottom="6pt" margin-left="6pt" margin-right="8pt" margin-top="1pt" textAlignment="center"/></title><cornerLabels><vizml:style color="#000000" font-family="SansSerif" font-size="9pt" font-weight="regular" labelLocationVertical="negative" margin-bottom="1pt" margin-left="6pt" margin-right="8pt" margin-top="1pt" textAlignment="left"/></cornerLabels></cellFormatProperties><borderProperties><topInnerFrame borderStyleType="thick" color="#000000"/><rightInnerFrame borderStyleType="thick" color="#000000"/><horizontalDimensionBorderColumns borderStyleType="solid" color="#000000"/><horizontalDimensionBorderRows borderStyleType="solid" color="#000000"/><horizontalCategoryBorderColumns borderStyleType="solid" color="#000000"/><leftInnerFrame borderStyleType="thick" color="#000000"/><verticalDimensionBorderRows borderStyleType="none" color="#000000"/><titleLayerSeparator borderStyleType="none" color="#000000"/><verticalCategoryBorderRows borderStyleType="none" color="#000000"/><topOuterFrame borderStyleType="none" color="#000000"/><bottomInnerFrame borderStyleType="thick" color="#000000"/><leftOuterFrame borderStyleType="none" color="#000000"/><dataAreaTop borderStyleType="thick" color="#000000"/><verticalDimensionBorderColumns borderStyleType="solid" color="#000000"/><dataAreaLeft borderStyleType="thick" color="#000000"/><horizontalCategoryBorderRows borderStyleType="none" color="#000000"/><bottomOuterFrame borderStyleType="none" color="#000000"/><rightOuterFrame borderStyleType="none" color="#000000"/><verticalCategoryBorderColumns borderStyleType="solid" color="#000000"/></borderProperties><printingProperties printAllLayers="false" rescaleLongTableToFitPage="false" rescaleWideTableToFitPage="false" windowOrphanLines="2"/></tableProperties><vtb:tableStructure><vtb:path>00000000015_8614836896836098326_table.xml</vtb:path><vtb:dataPath>00000000015_8614836896836098326_tableData.bin</vtb:dataPath></vtb:tableStructure></vtb:table></container><heading commandName="Oneway"><label>Post Hoc Tests</label><container text-align="left" visibility="visible"><label>Title</label><vtx:text commandName="Oneway" type="title"><html xmlns="http://www.w3.org/1999/xhtml" lang="en"><![CDATA[<head><style type="text/css">p{color:0;font-family:SansSerif;font-size:18pt;font-style:normal;font-weight:bold;text-decoration:none}</style></head><BR>Post&nbsp;Hoc&nbsp;Tests]]></html></vtx:text></container><container text-align="left" visibility="visible"><label>Multiple Comparisons</label><vtb:table VDPId="4410163694732318998" ViZmlSource="6065236557790976278" commandName="Oneway" subType="Table" tableLookId="tableLookApplied" type="table"><tableProperties><generalProperties hideEmptyRows="true" maximumColumnWidth="72" maximumRowWidth="120" minimumColumnWidth="50" minimumRowWidth="36" rowDimensionLabels="inCorner"/><footnoteProperties markerPosition="superscript" numberFormat="alphabetic"/><cellFormatProperties><caption><vizml:style color="#000000" font-family="SansSerif" font-size="9pt" font-weight="regular" labelLocationVertical="positive" margin-bottom="1pt" margin-left="6pt" margin-right="8pt" margin-top="1pt" textAlignment="left"/></caption><footnotes><vizml:style color="#000000" font-family="SansSerif" font-size="9pt" font-weight="regular" labelLocationVertical="positive" margin-bottom="2pt" margin-left="18pt" margin-right="18pt" margin-top="2pt" textAlignment="left"/></footnotes><rowLabels><vizml:style color="#000000" font-family="SansSerif" font-size="9pt" font-weight="regular" labelLocationVertical="positive" margin-bottom="1pt" margin-left="6pt" margin-right="8pt" margin-top="1pt" textAlignment="left"/></rowLabels><columnLabels><vizml:style color="#000000" font-family="SansSerif" font-size="9pt" font-weight="regular" labelLocationVertical="negative" margin-bottom="2pt" margin-left="6pt" margin-right="8pt" margin-top="1pt" textAlignment="center"/></columnLabels><data><vizml:style color="#000000" font-family="SansSerif" font-size="9pt" font-weight="regular" labelLocationVertical="center" margin-bottom="1pt" margin-left="6pt" margin-right="8pt" margin-top="1pt" textAlignment="mixed"/></data><layers><vizml:style color="#000000" font-family="SansSerif" font-size="9pt" font-weight="regular" labelLocationVertical="negative" margin-bottom="1pt" margin-left="6pt" margin-right="8pt" margin-top="1pt" textAlignment="left"/></layers><title><vizml:style color="#000000" font-family="SansSerif" font-size="9pt" font-weight="bold" labelLocationVertical="center" margin-bottom="6pt" margin-left="6pt" margin-right="8pt" margin-top="1pt" textAlignment="center"/></title><cornerLabels><vizml:style color="#000000" font-family="SansSerif" font-size="9pt" font-weight="regular" labelLocationVertical="negative" margin-bottom="1pt" margin-left="6pt" margin-right="8pt" margin-top="1pt" textAlignment="left"/></cornerLabels></cellFormatProperties><borderProperties><topInnerFrame borderStyleType="thick" color="#000000"/><rightInnerFrame borderStyleType="thick" color="#000000"/><horizontalDimensionBorderColumns borderStyleType="solid" color="#000000"/><horizontalDimensionBorderRows borderStyleType="solid" color="#000000"/><horizontalCategoryBorderColumns borderStyleType="solid" color="#000000"/><leftInnerFrame borderStyleType="thick" color="#000000"/><verticalDimensionBorderRows borderStyleType="none" color="#000000"/><titleLayerSeparator borderStyleType="none" color="#000000"/><verticalCategoryBorderRows borderStyleType="none" color="#000000"/><topOuterFrame borderStyleType="none" color="#000000"/><bottomInnerFrame borderStyleType="thick" color="#000000"/><leftOuterFrame borderStyleType="none" color="#000000"/><dataAreaTop borderStyleType="thick" color="#000000"/><verticalDimensionBorderColumns borderStyleType="solid" color="#000000"/><dataAreaLeft borderStyleType="thick" color="#000000"/><horizontalCategoryBorderRows borderStyleType="none" color="#000000"/><bottomOuterFrame borderStyleType="none" color="#000000"/><rightOuterFrame borderStyleType="none" color="#000000"/><verticalCategoryBorderColumns borderStyleType="solid" color="#000000"/></borderProperties><printingProperties printAllLayers="false" rescaleLongTableToFitPage="false" rescaleWideTableToFitPage="false" windowOrphanLines="2"/></tableProperties><vtb:tableStructure><vtb:path>000000000161_6065236557790976278_table.xml</vtb:path><vtb:dataPath>000000000161_6065236557790976278_tableData.bin</vtb:dataPath></vtb:tableStructure></vtb:table></container></heading></heading></heading>
